# Supplementary material
Source: PubMed Central journal article supplement (PMC6645415)
Supplement: ao8b00946_si_001.pdf [file ao8b00946_si_001.pdf]

# Supporting Information

## Exploring Multifunctional Applications of Hexagonal Boron Arsenide Sheet: A DFT Study

*Kamaraj Manoharan<sup>†</sup> and Venkatesan Subramanian<sup>†\*</sup>*

<sup>†</sup>Chemical Laboratory, Inorganic & Physical Chemistry Division, CSIR-Central Leather Research

Institute, Adyar, Chennai 600 020, India.

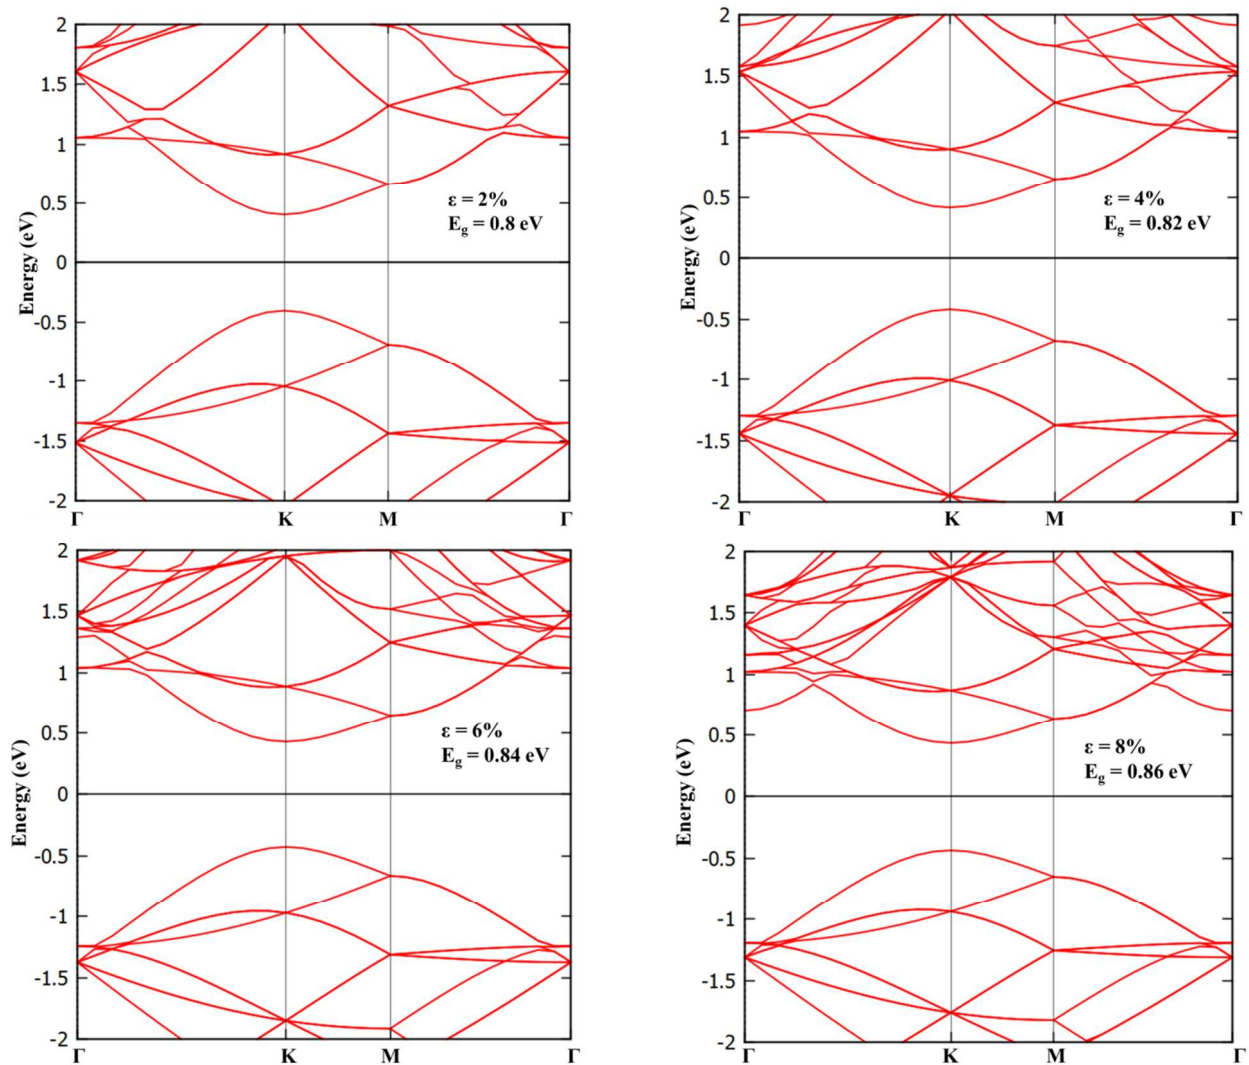

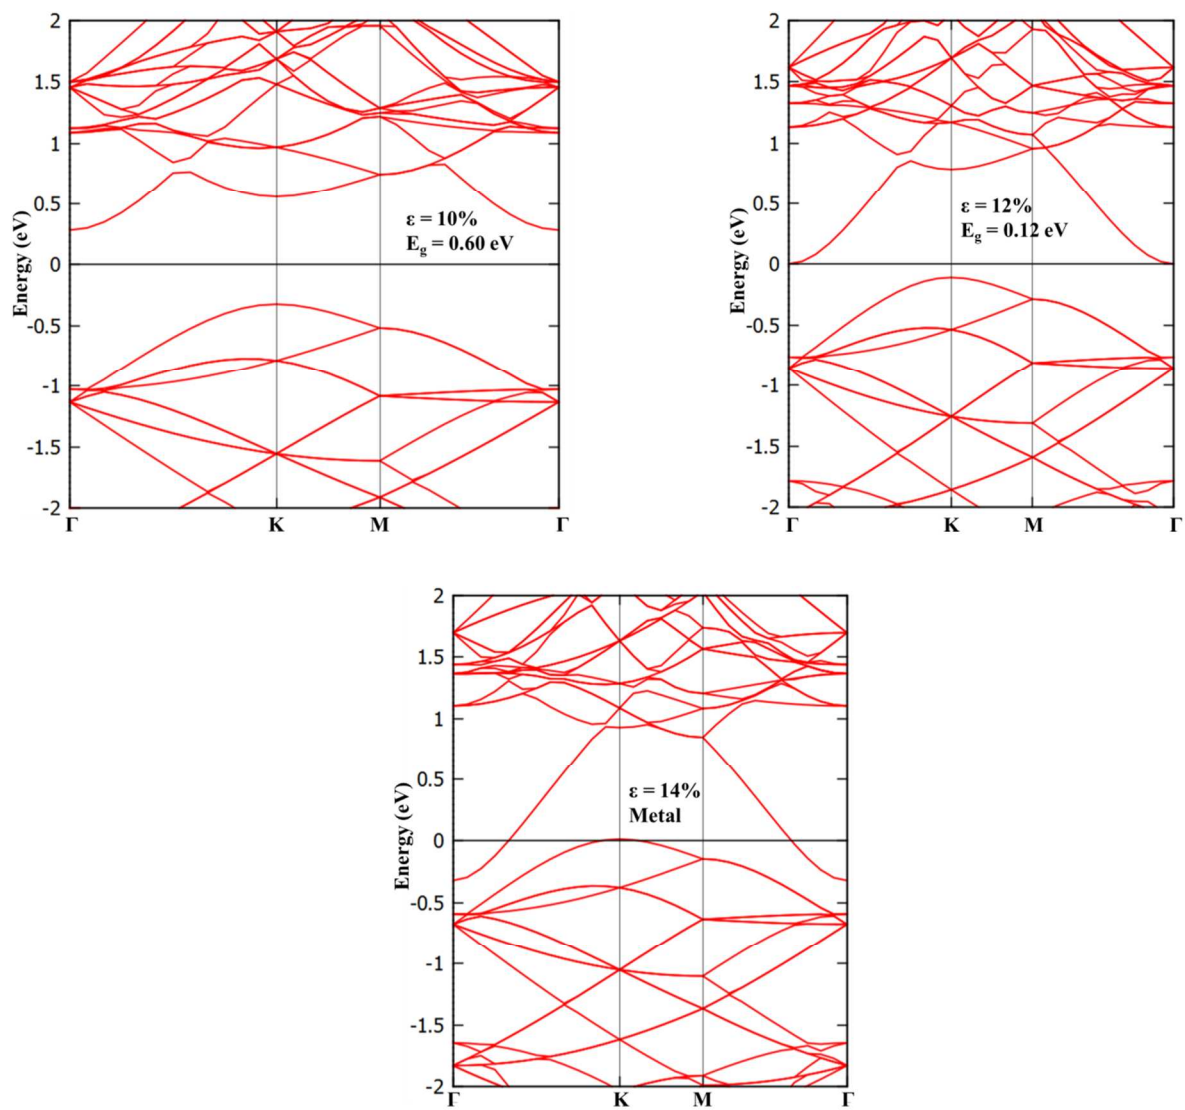

**SI Figure S1. Strain induced electronic band structure of BA sheet with different biaxial strains.**

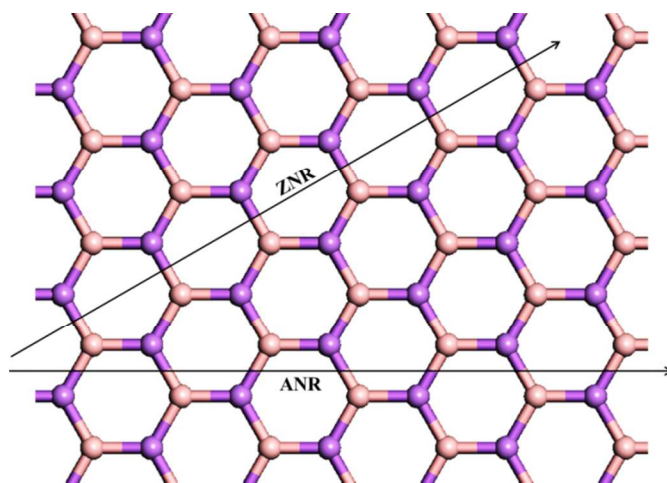

SI Figure S2. Schematic diagram of cutting 1D nano ribbons from 2D sheet

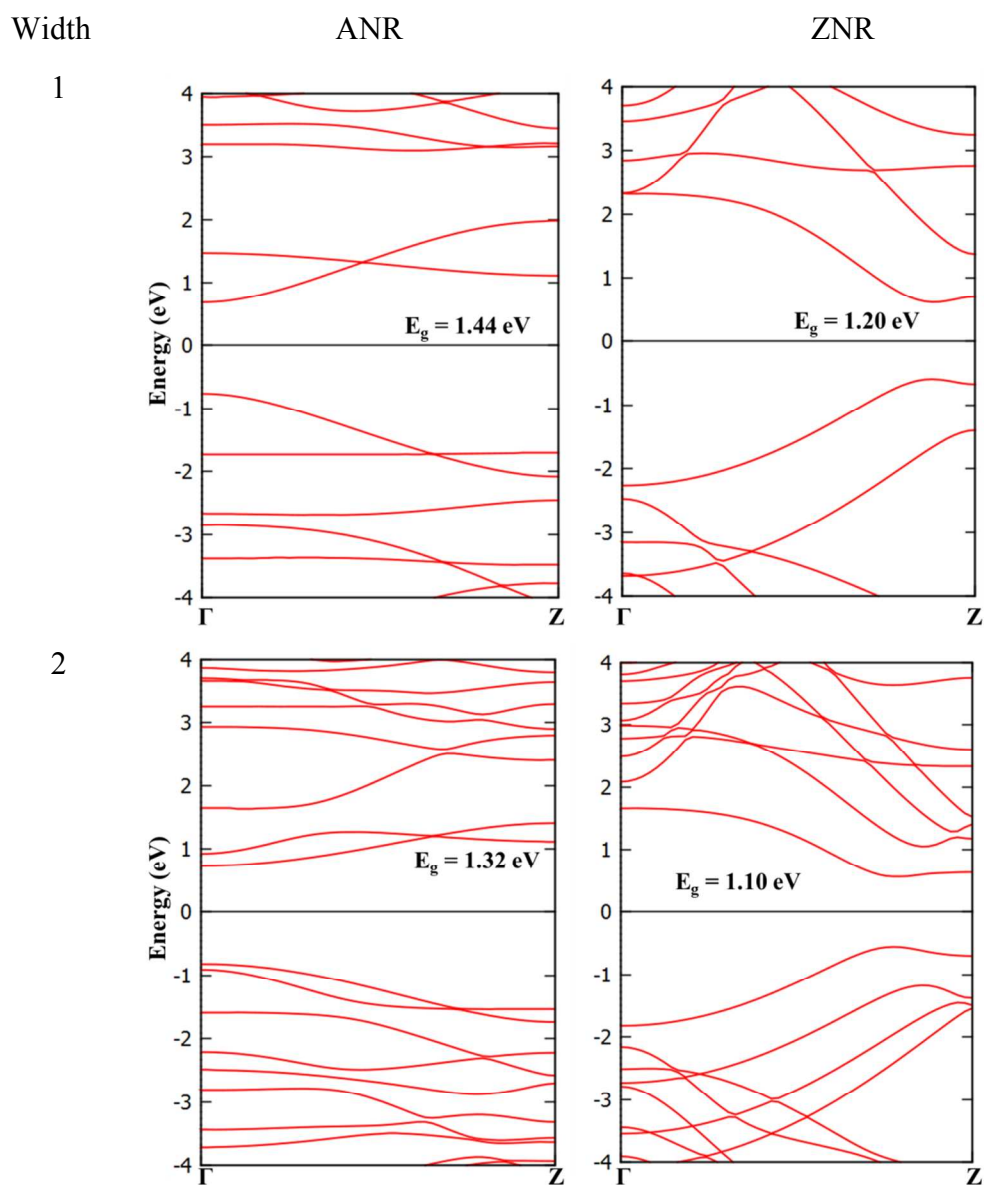

3

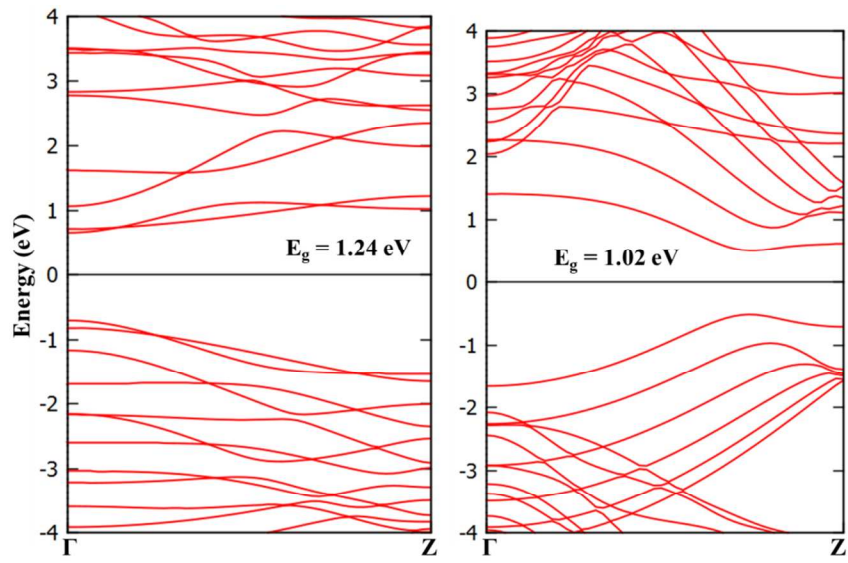

4

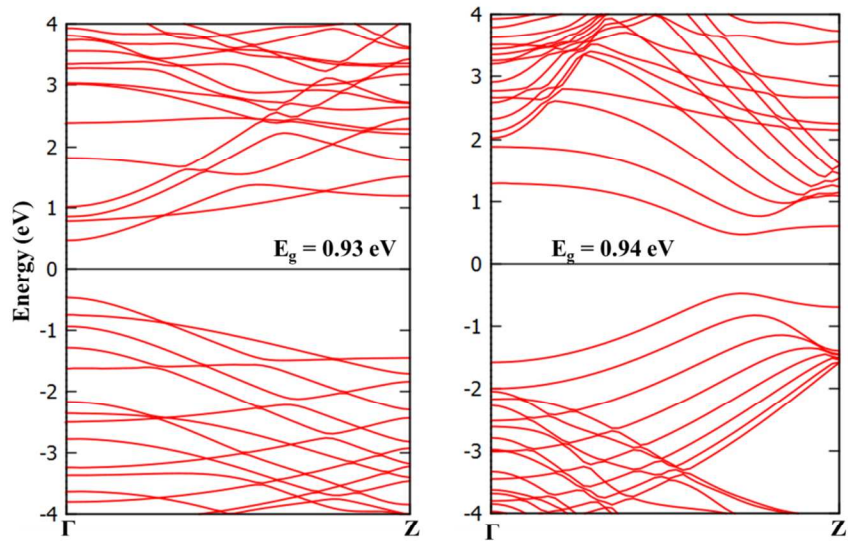

5

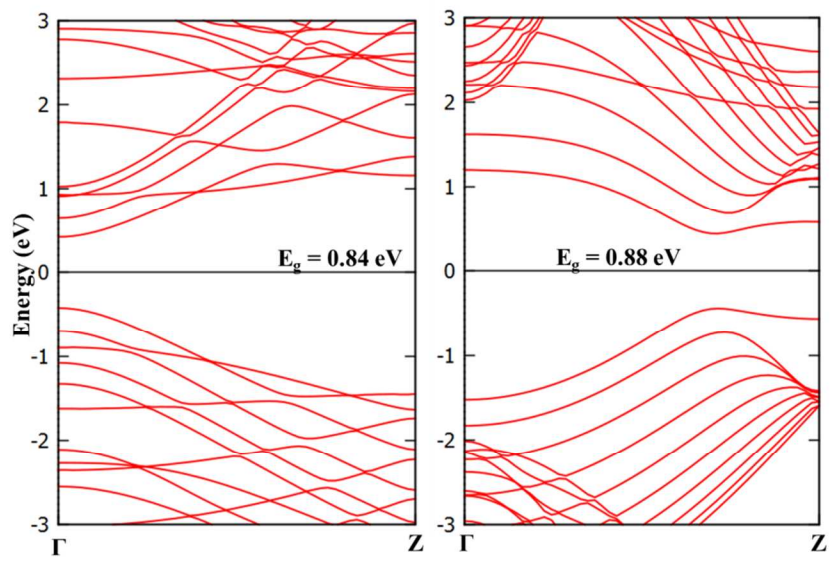



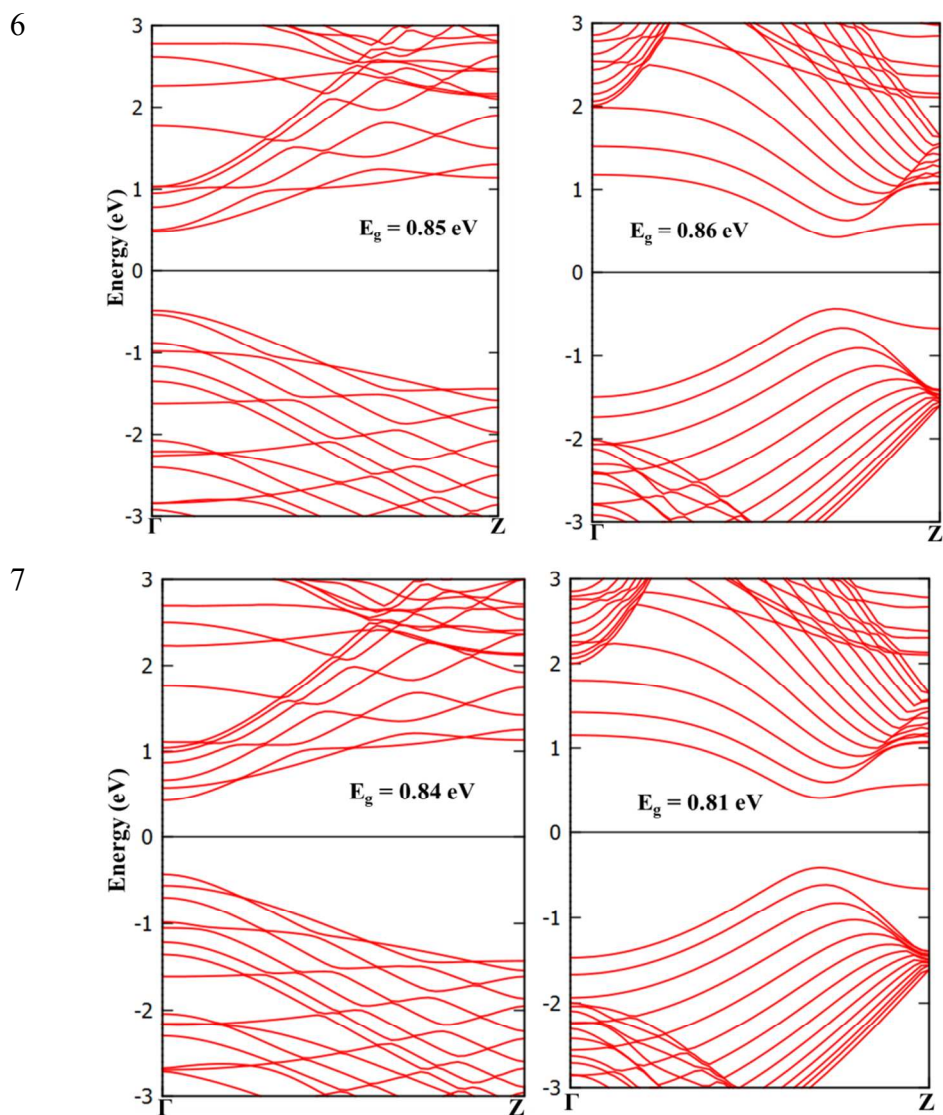

SI Figure S3. The calculated band structures of armchair and zigzag nanoribbons with various size (width  $n=1-7$ ).

SI Table T1: Wyckoff position of BAs sheet

| Atom | Wyckoff position | X       | Y       | Z       |
|------|------------------|---------|---------|---------|
| B    | 1b               | 0.00000 | 0.00000 | 0.50000 |
| As   | 1f               | 0.66667 | 0.33333 | 0.50000 |

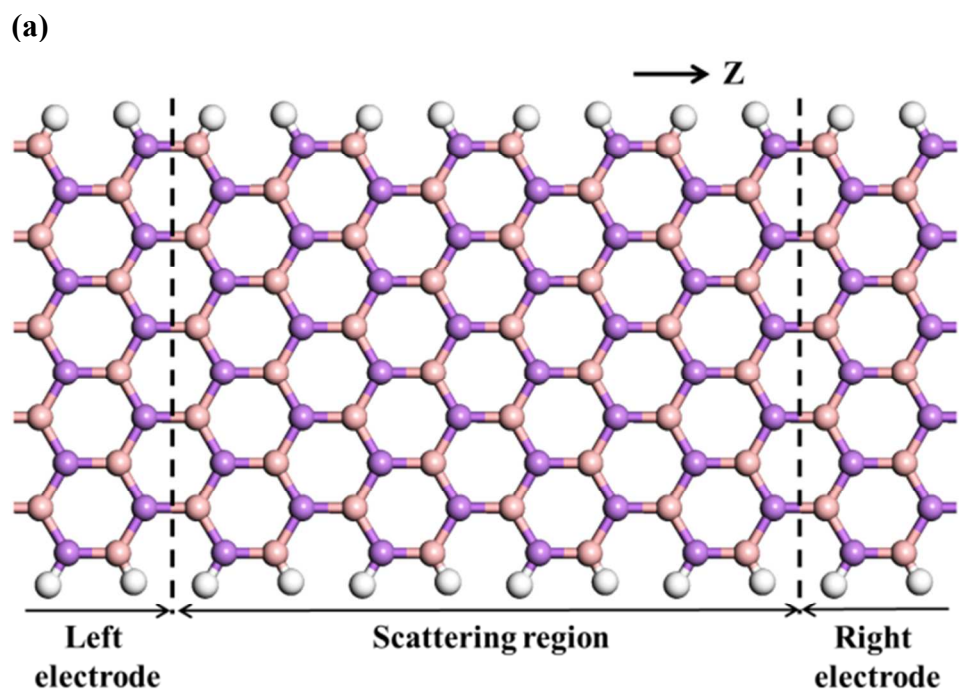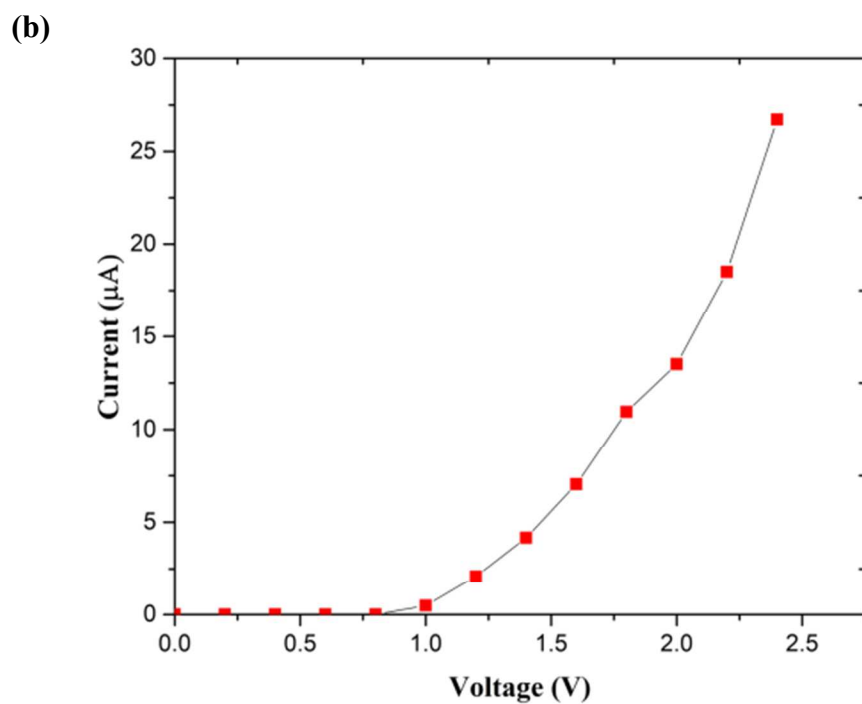

SI Figure S4. (a) The schematic diagram of device model of 10ANR and (b) corresponding I-V characteristics

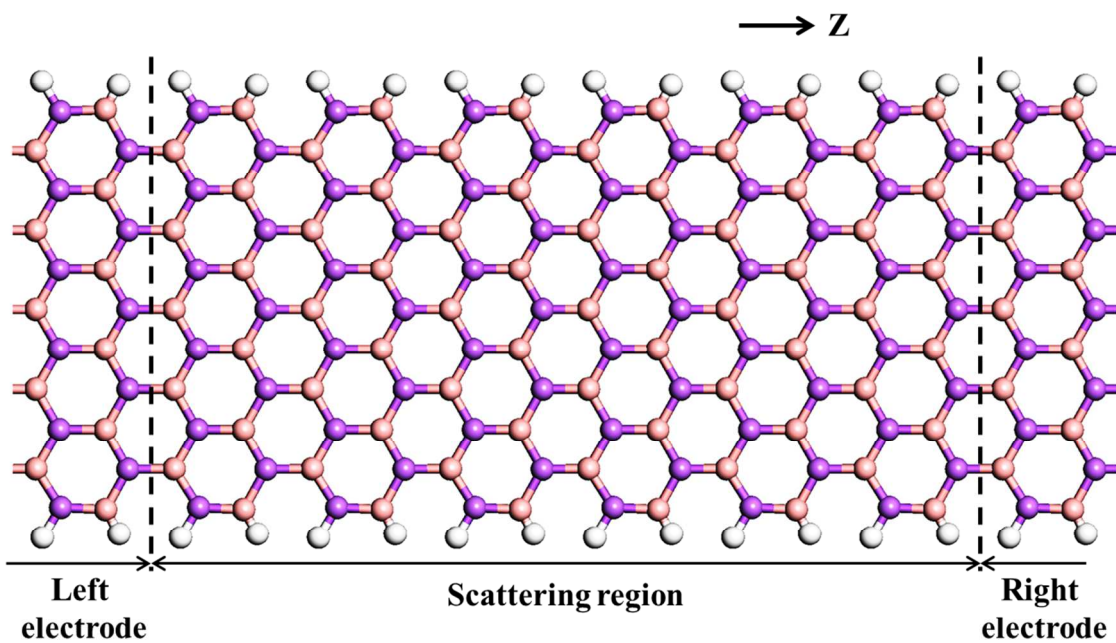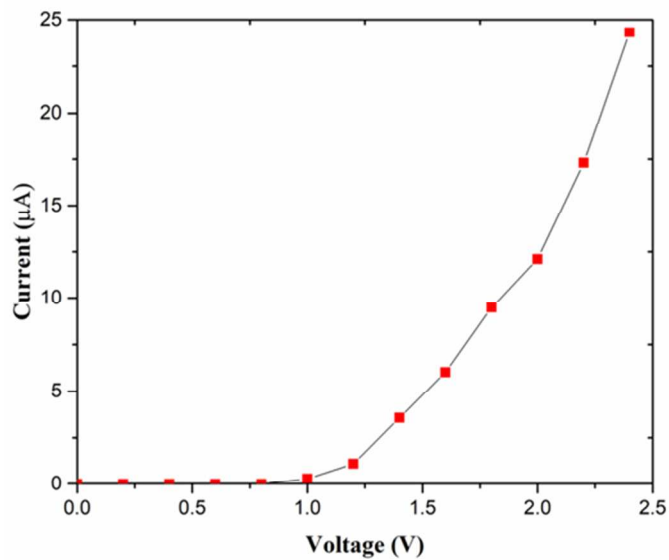

**SI Figure S5. (a) The schematic diagram of device model of 11ANR with increased scattering length and (b) corresponding I-V characteristics**
